# Supplementary material for: NiIIand CuIIcomplexes of a salen ligand bearing ferrocenes in its secondary coordination sphere
Source: Royal Society of Chemistry journal article supplement (doi:10.1039/d2ra07671c), 2023-01-01
Supplement: d2ra07671c1.pdf [file d2ra07671c1.pdf]

Ni<sup>II</sup> and Cu<sup>II</sup> complexes of a salen ligand bearing ferrocenes in its secondary coordination sphere  
sphere

Supporting Information

Rachel Sailer, Warren VandeVen, Kaeden Teindl, Linus Chiang

## Mass spectrometry

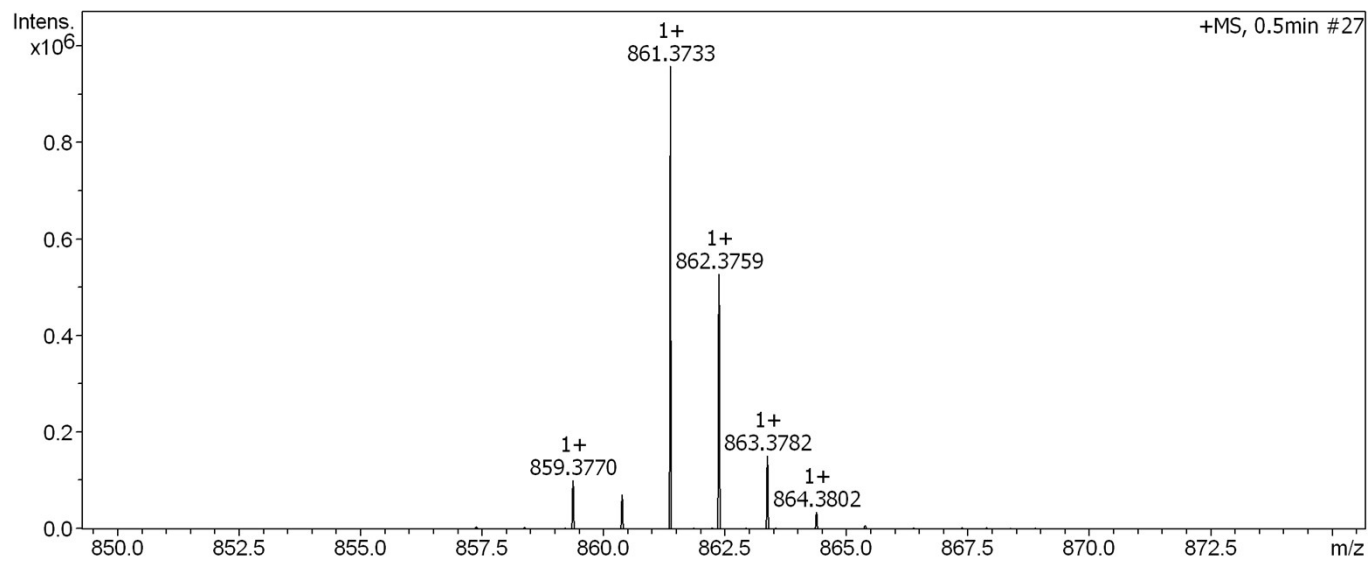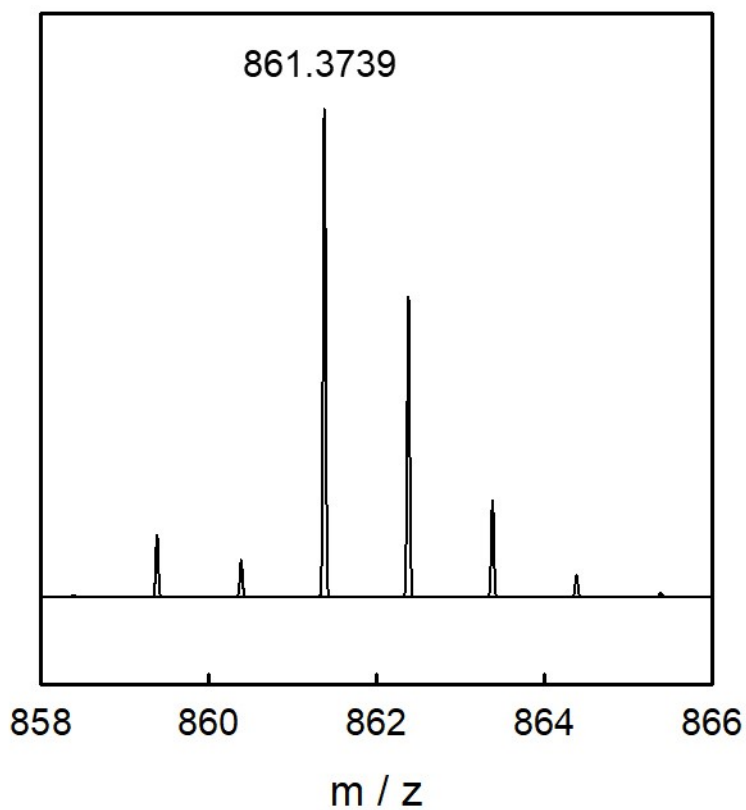

Figure S1. Experimental (top) and simulated (bottom) mass spectrum of  $\text{H}_2(\text{Sal})^{\text{Fc}}$ .

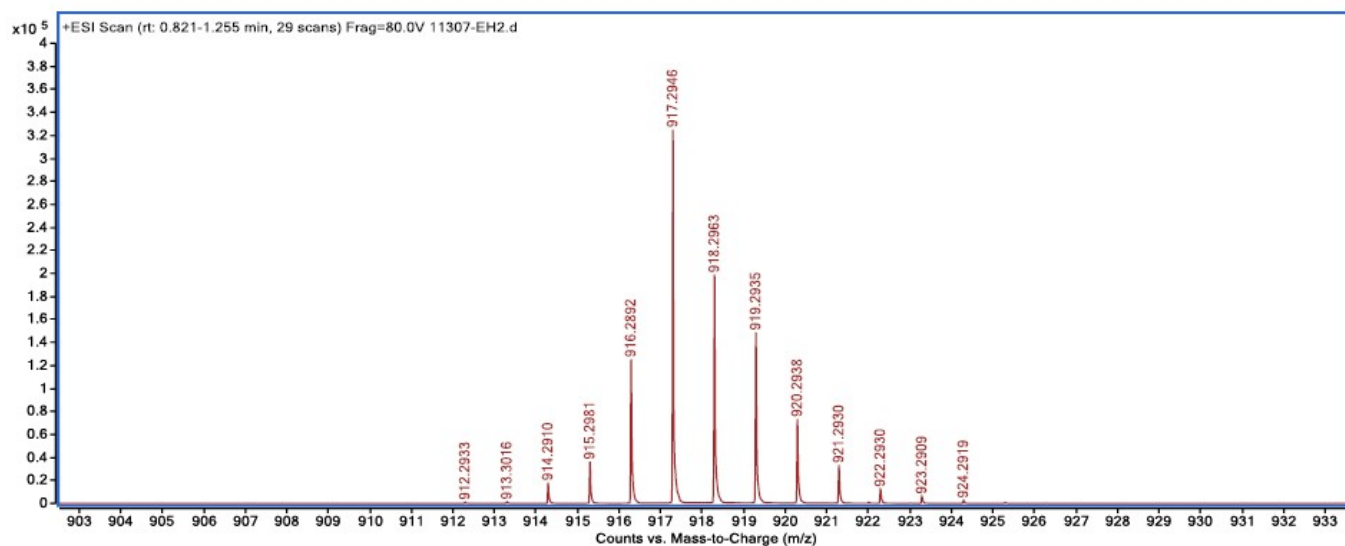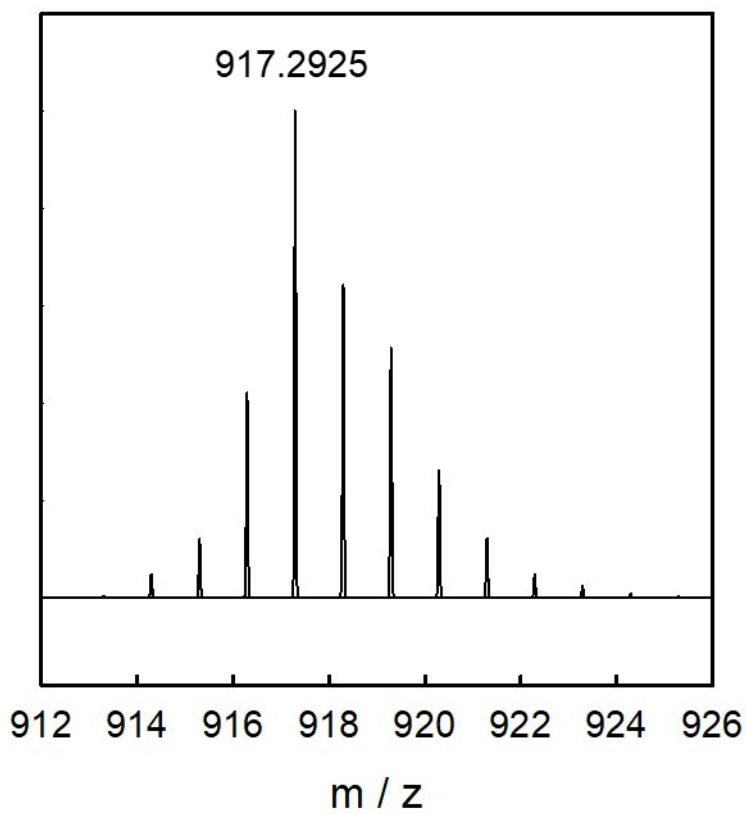

Figure S2. Experimental (top) and simulated (bottom) mass spectrum of Ni(Sal)<sup>Fc</sup>.

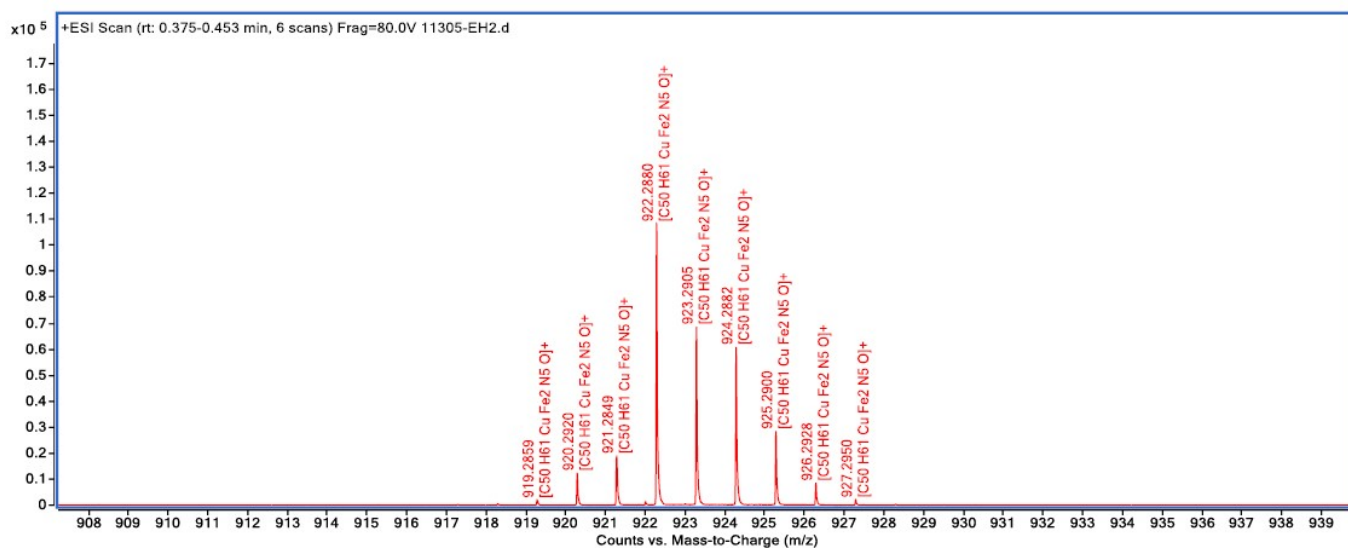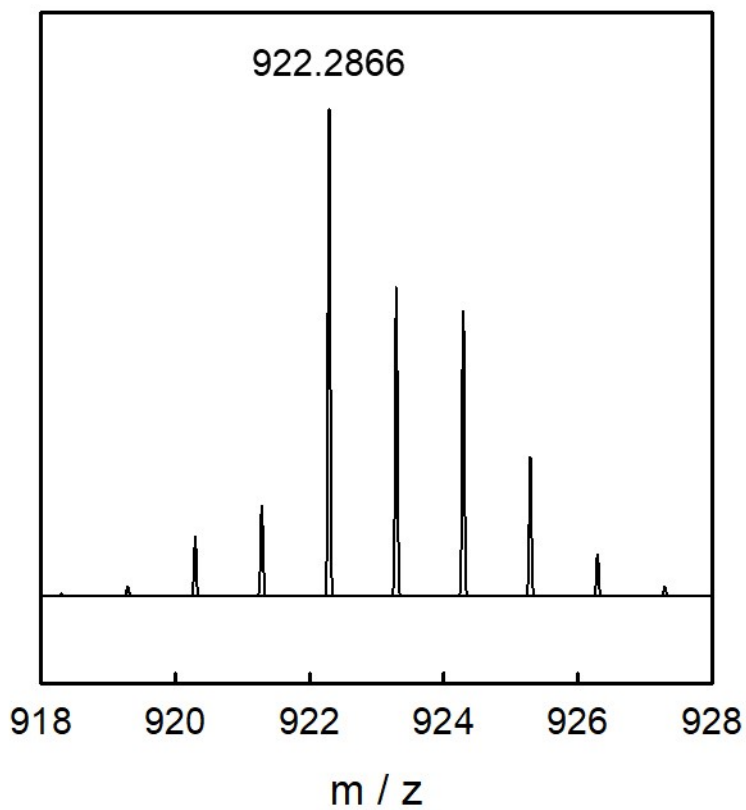

Figure S3. Experimental (top) and simulated (bottom) mass spectrum of **Cu(Sal)<sup>Fc</sup>**.

NMR spectroscopy:

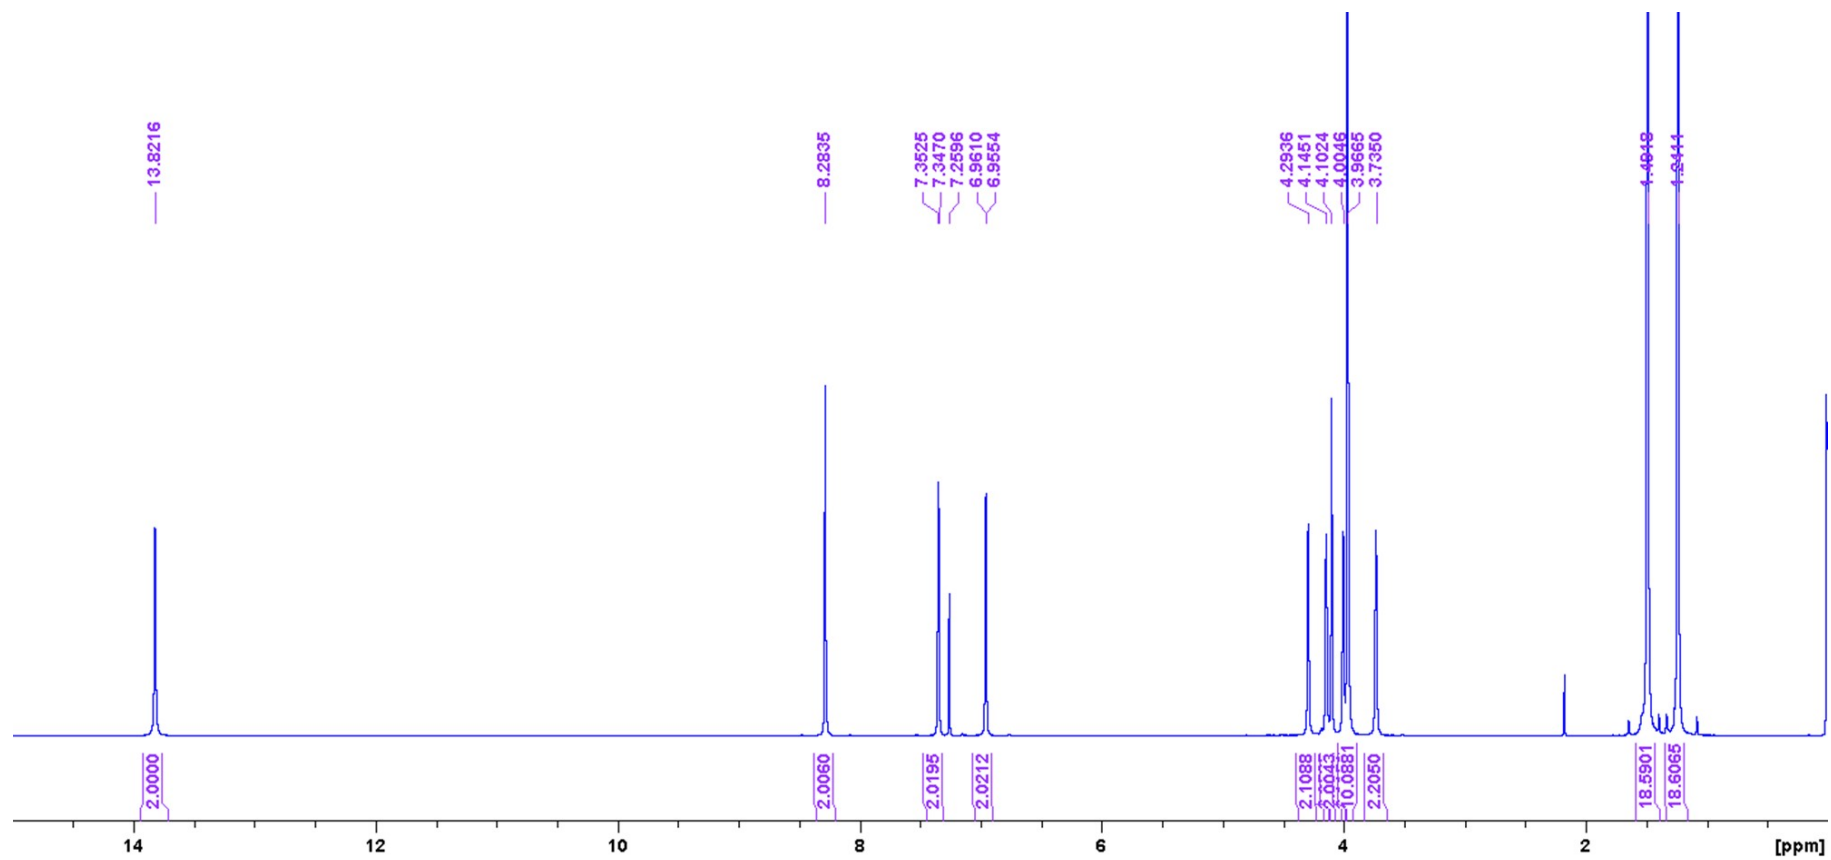

Figure S4.  $^1\text{H}$  NMR spectrum of  $\text{H}_2(\text{Sal})^{\text{Fc}}$  recorded in  $\text{CDCl}_3$  at 298 K.

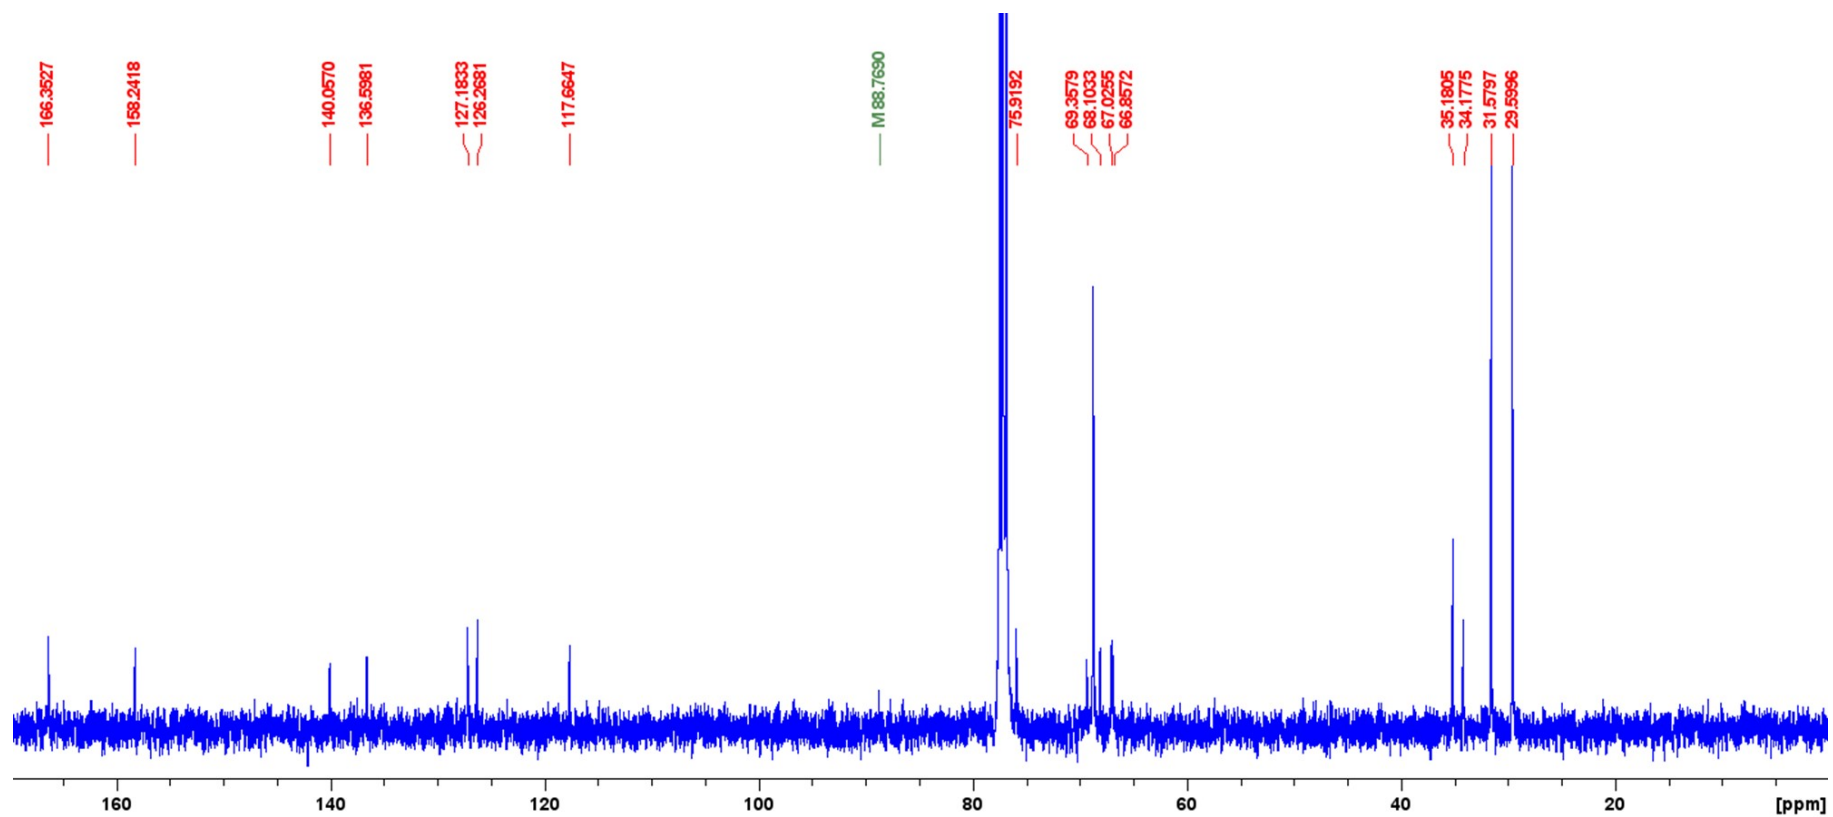

Figure S5.  $^{13}\text{C}$  NMR spectrum of  $\text{H}_2(\text{Sal})^{\text{Fc}}$  recorded in  $\text{CDCl}_3$  at 298 K.

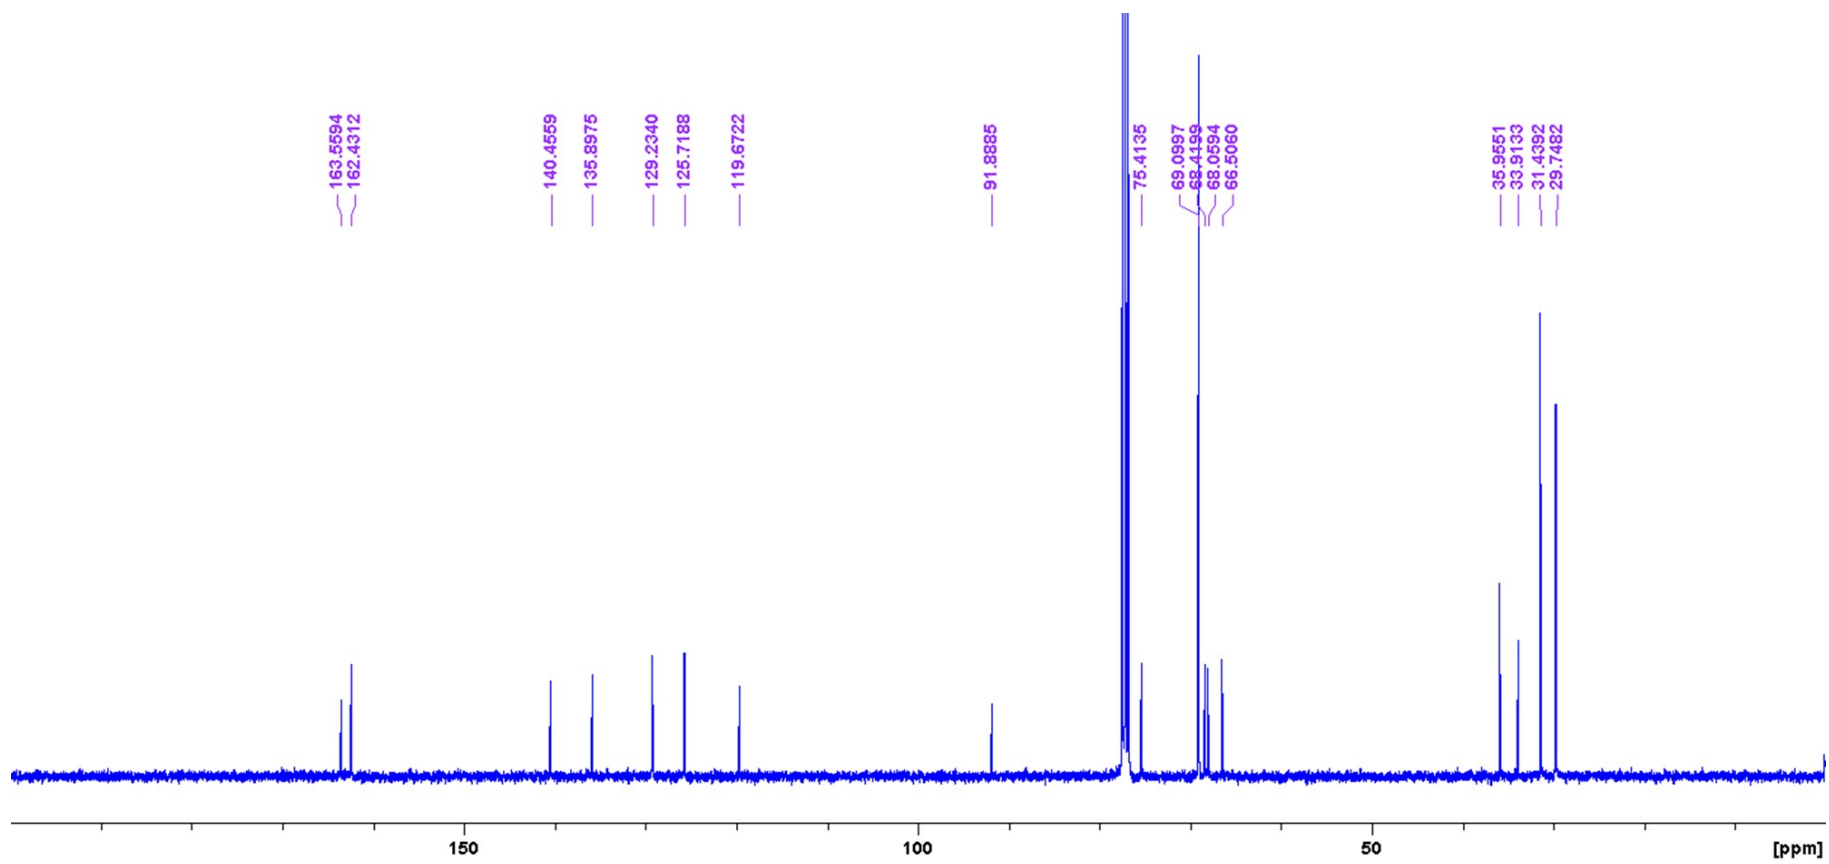

Figure S6.  $^{13}\text{C}$  NMR spectrum of  $\text{Ni}(\text{Sal})^{\text{Fc}}$  recorded in  $\text{CDCl}_3$  at 298 K.

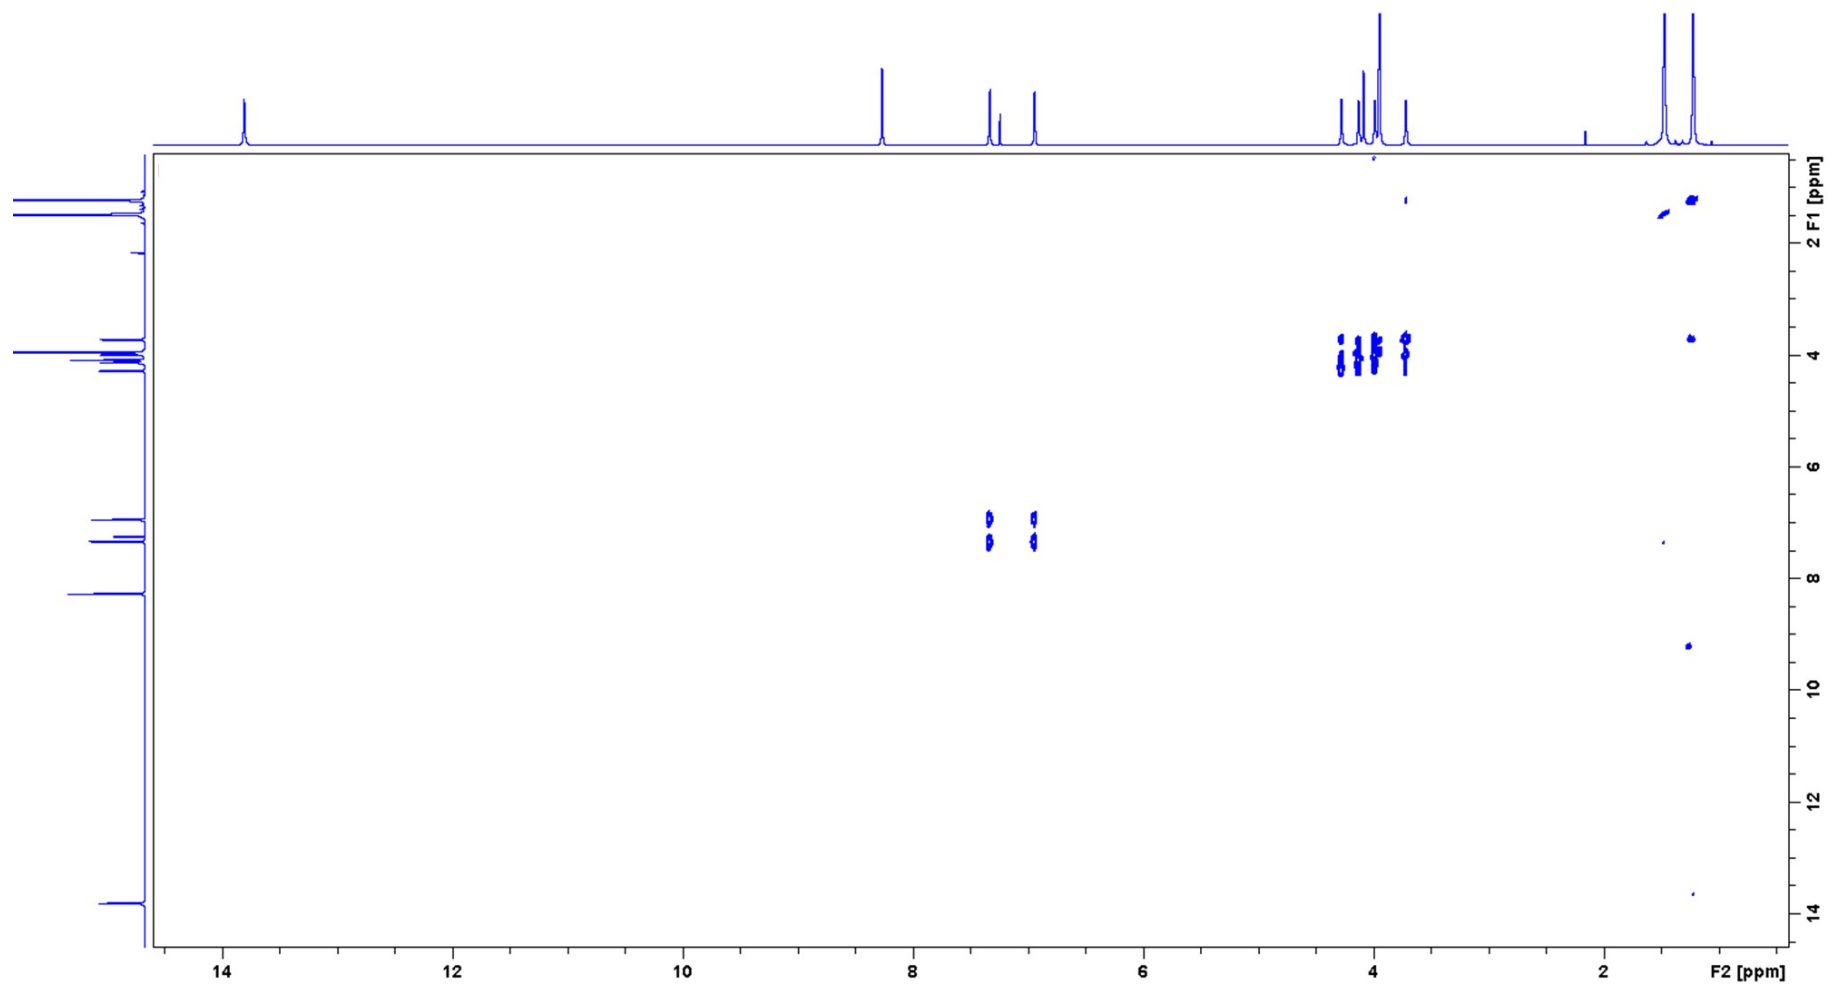

Figure S7. Full <sup>1</sup>H-<sup>1</sup>H COSY spectrum of **H<sub>2</sub>(Sal)<sup>Fc</sup>** recorded in CDCl<sub>3</sub> at 298 K.



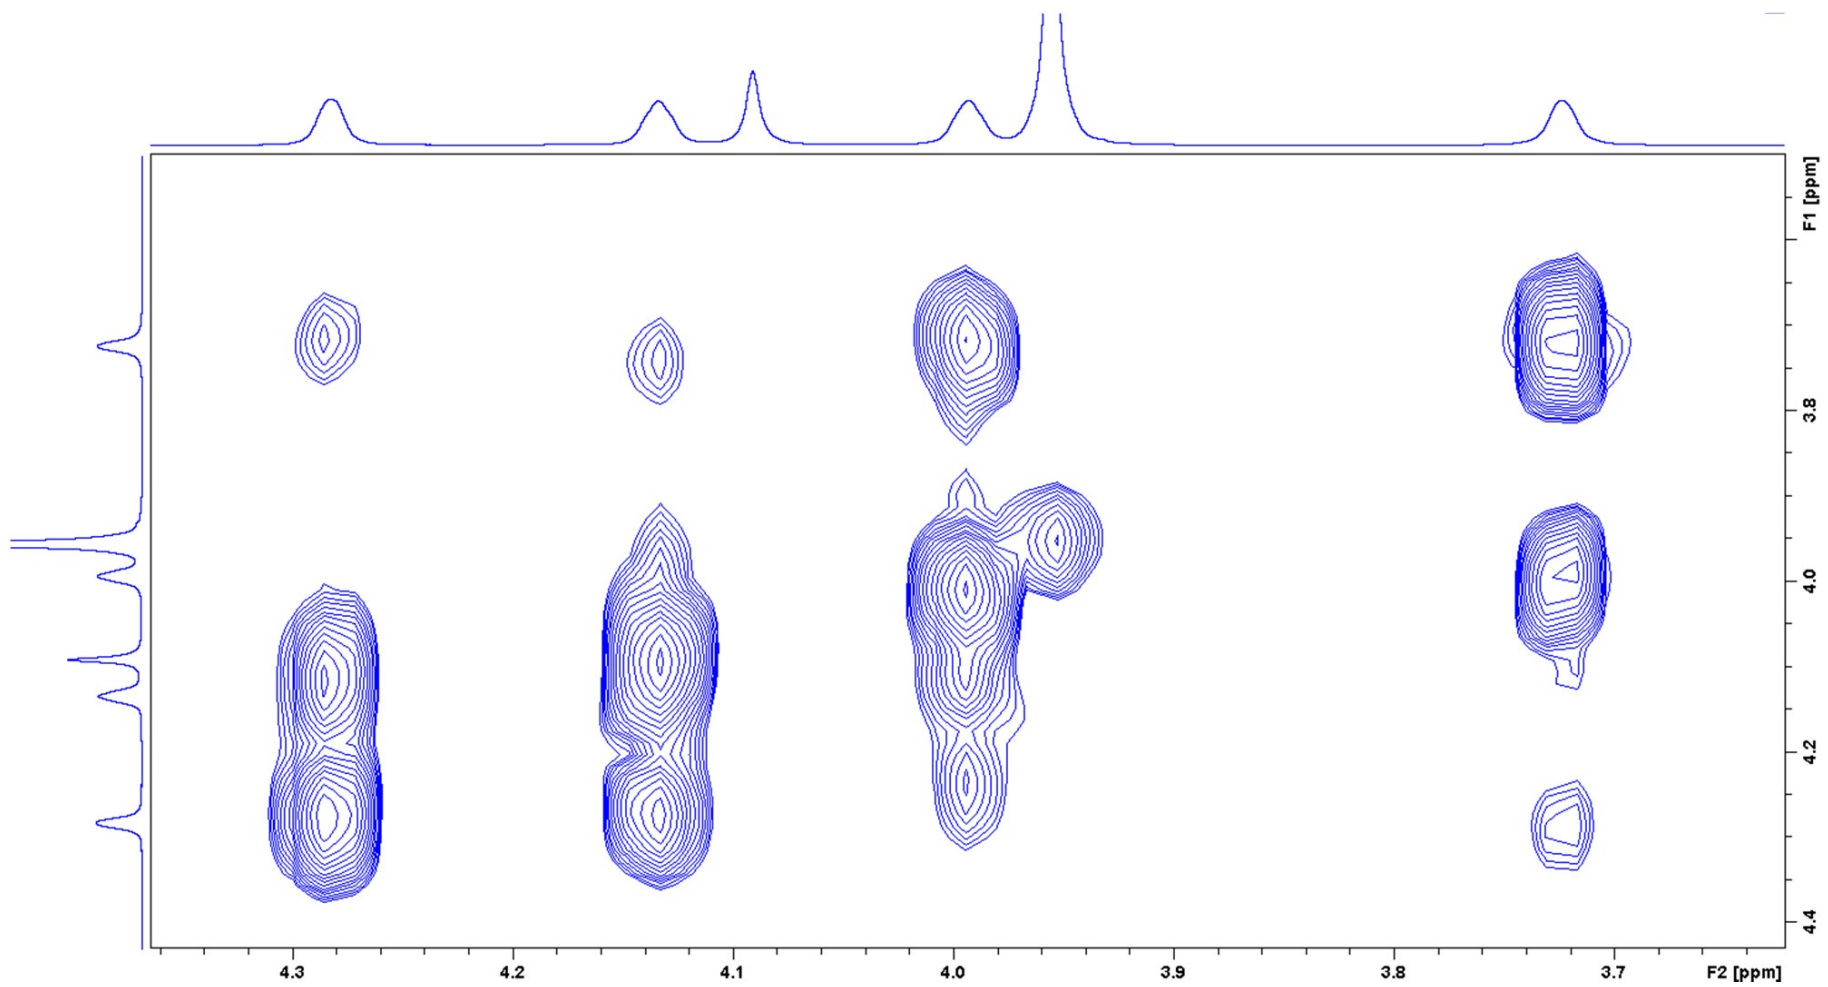

Figure S8. Magnified <sup>1</sup>H-<sup>1</sup>H COSY spectrum of **H<sub>2</sub>(Sal)<sup>Fc</sup>** recorded in CDCl<sub>3</sub> at 298 K.

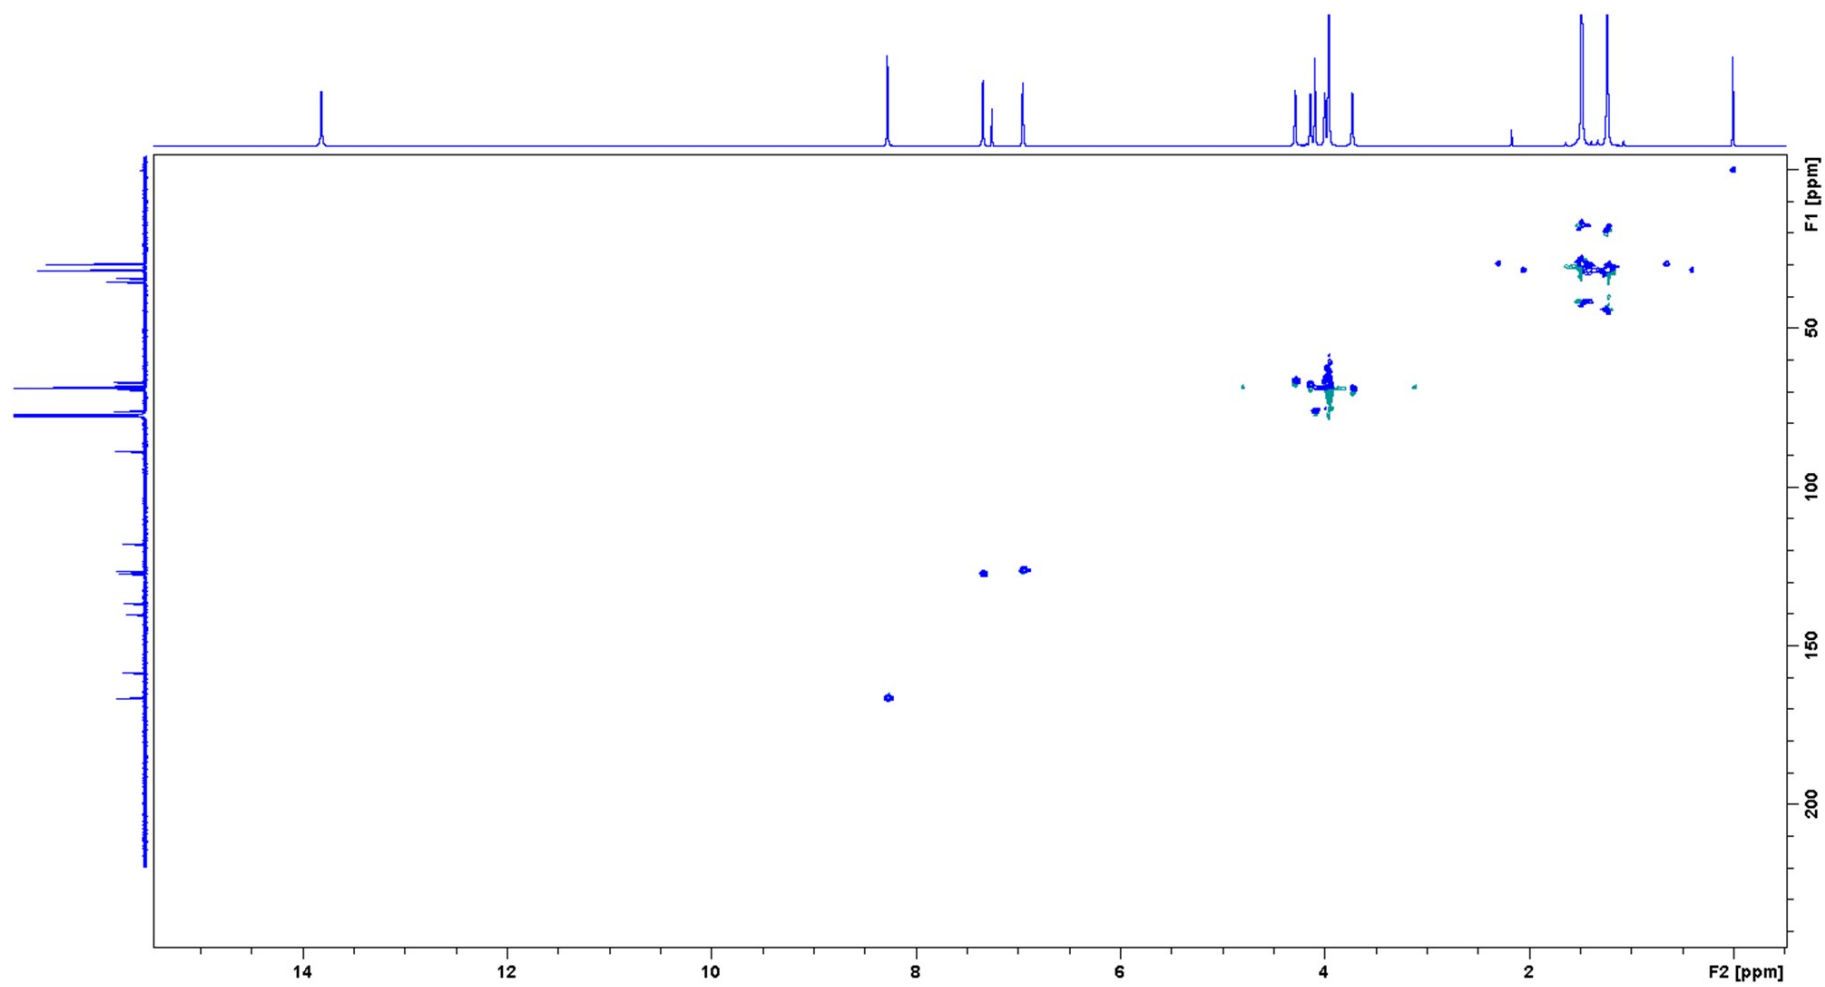

Figure S9. Full  $^1\text{H}$ - $^{13}\text{C}$  HSQC spectrum of  $\text{H}_2(\text{Sal})^{\text{Fc}}$  recorded in  $\text{CDCl}_3$  at 298 K.

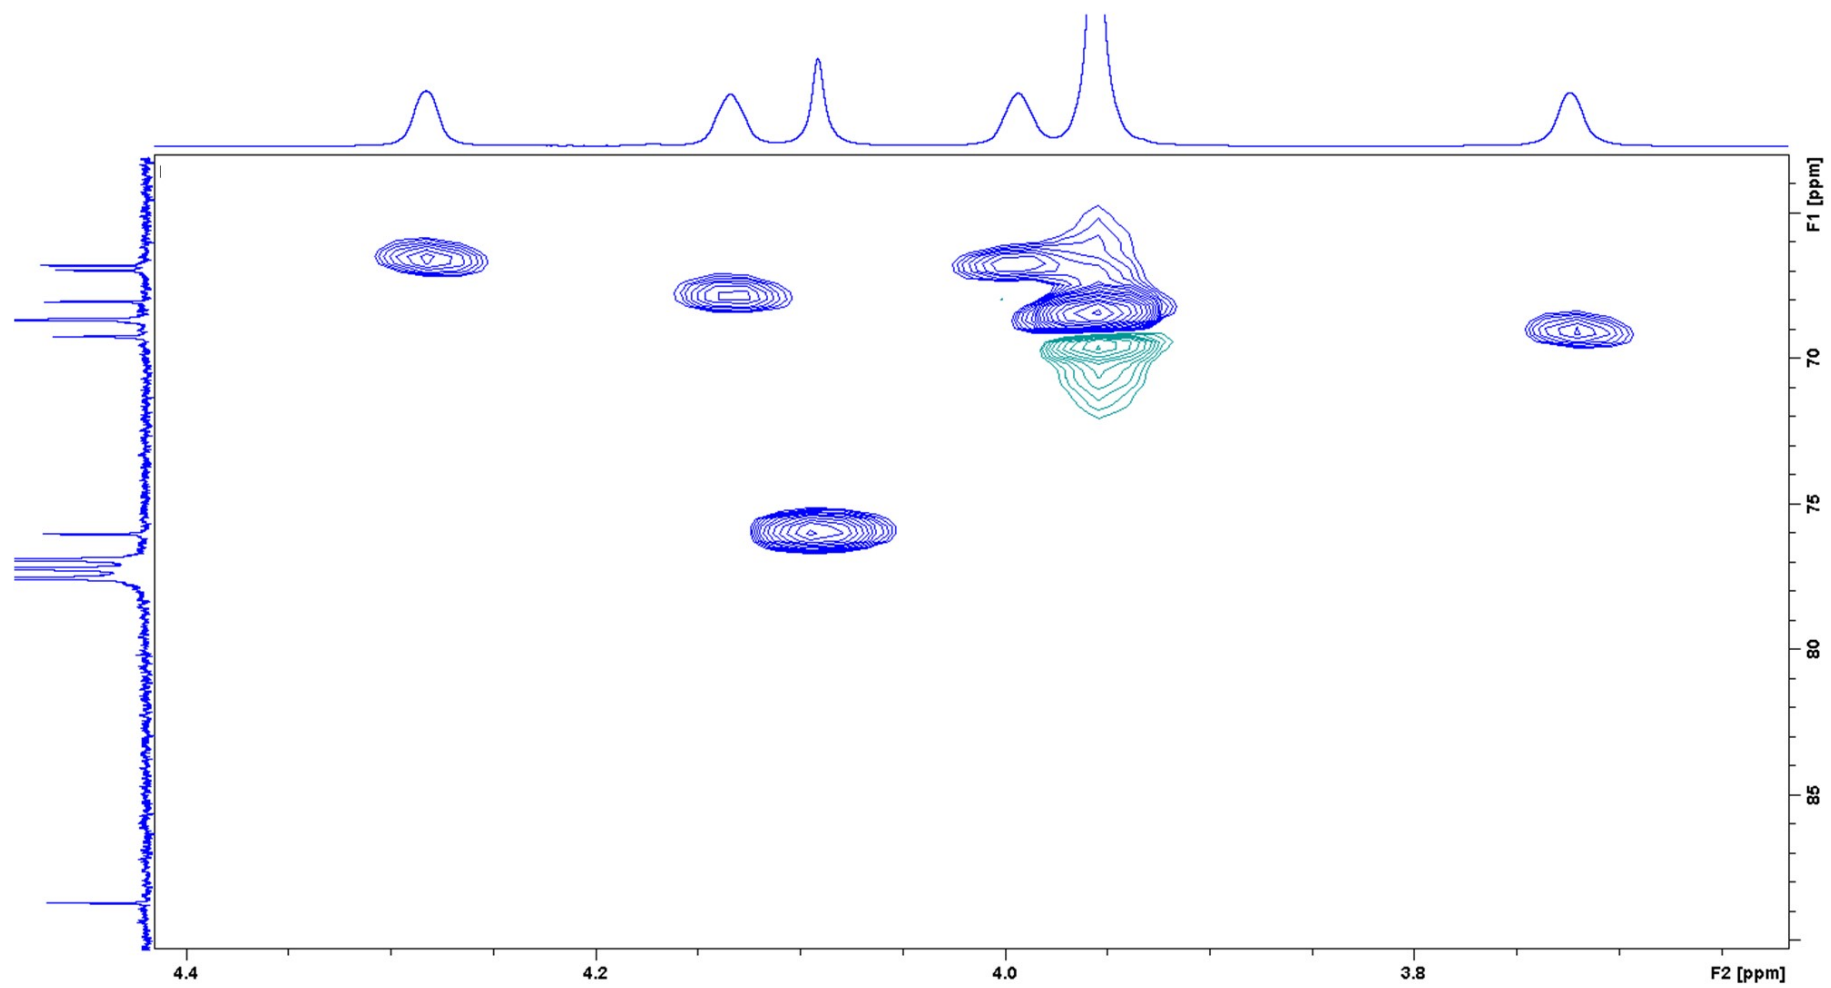

Figure S10. Magnified  $^1\text{H}$ - $^{13}\text{C}$  HSQC spectrum of  $\text{H}_2(\text{Sal})^{\text{Fc}}$  recorded in  $\text{CDCl}_3$  at 298 K.

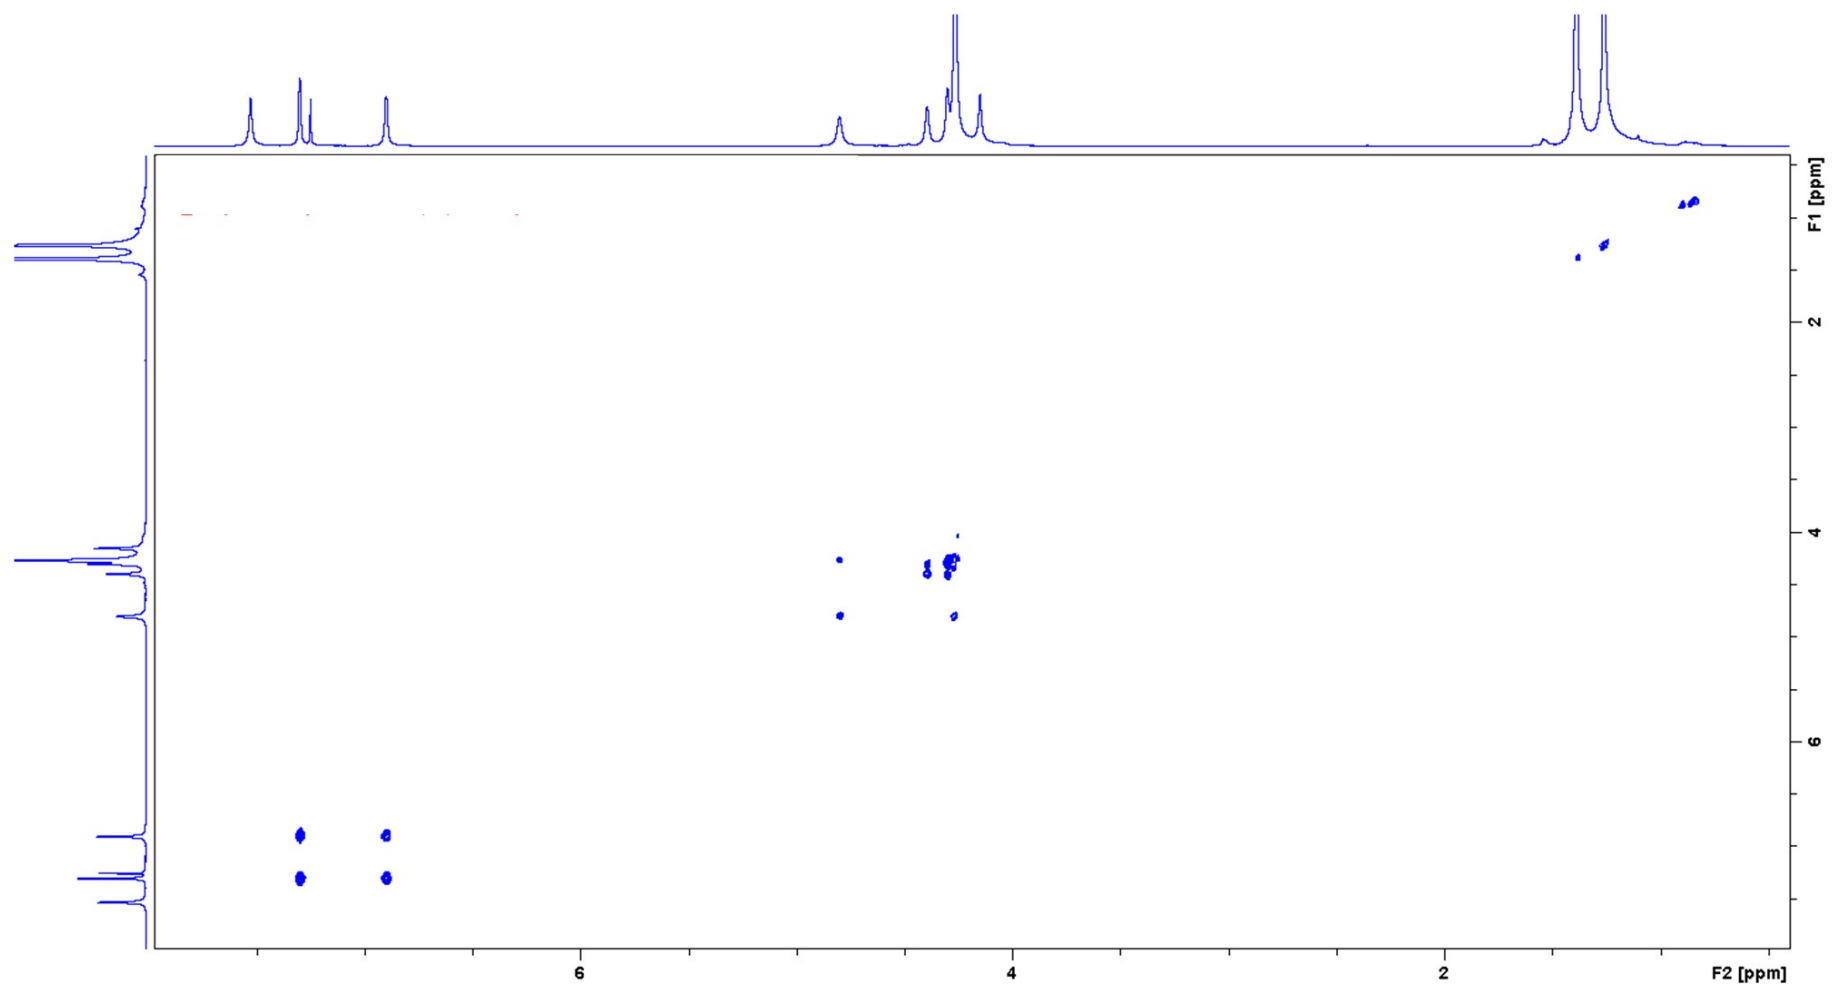

Figure S11. Full  $^1\text{H}$ - $^1\text{H}$  COSY spectrum of  $\text{Ni}(\text{Sal})^{\text{Fc}}$  recorded in  $\text{CDCl}_3$  at 298 K.

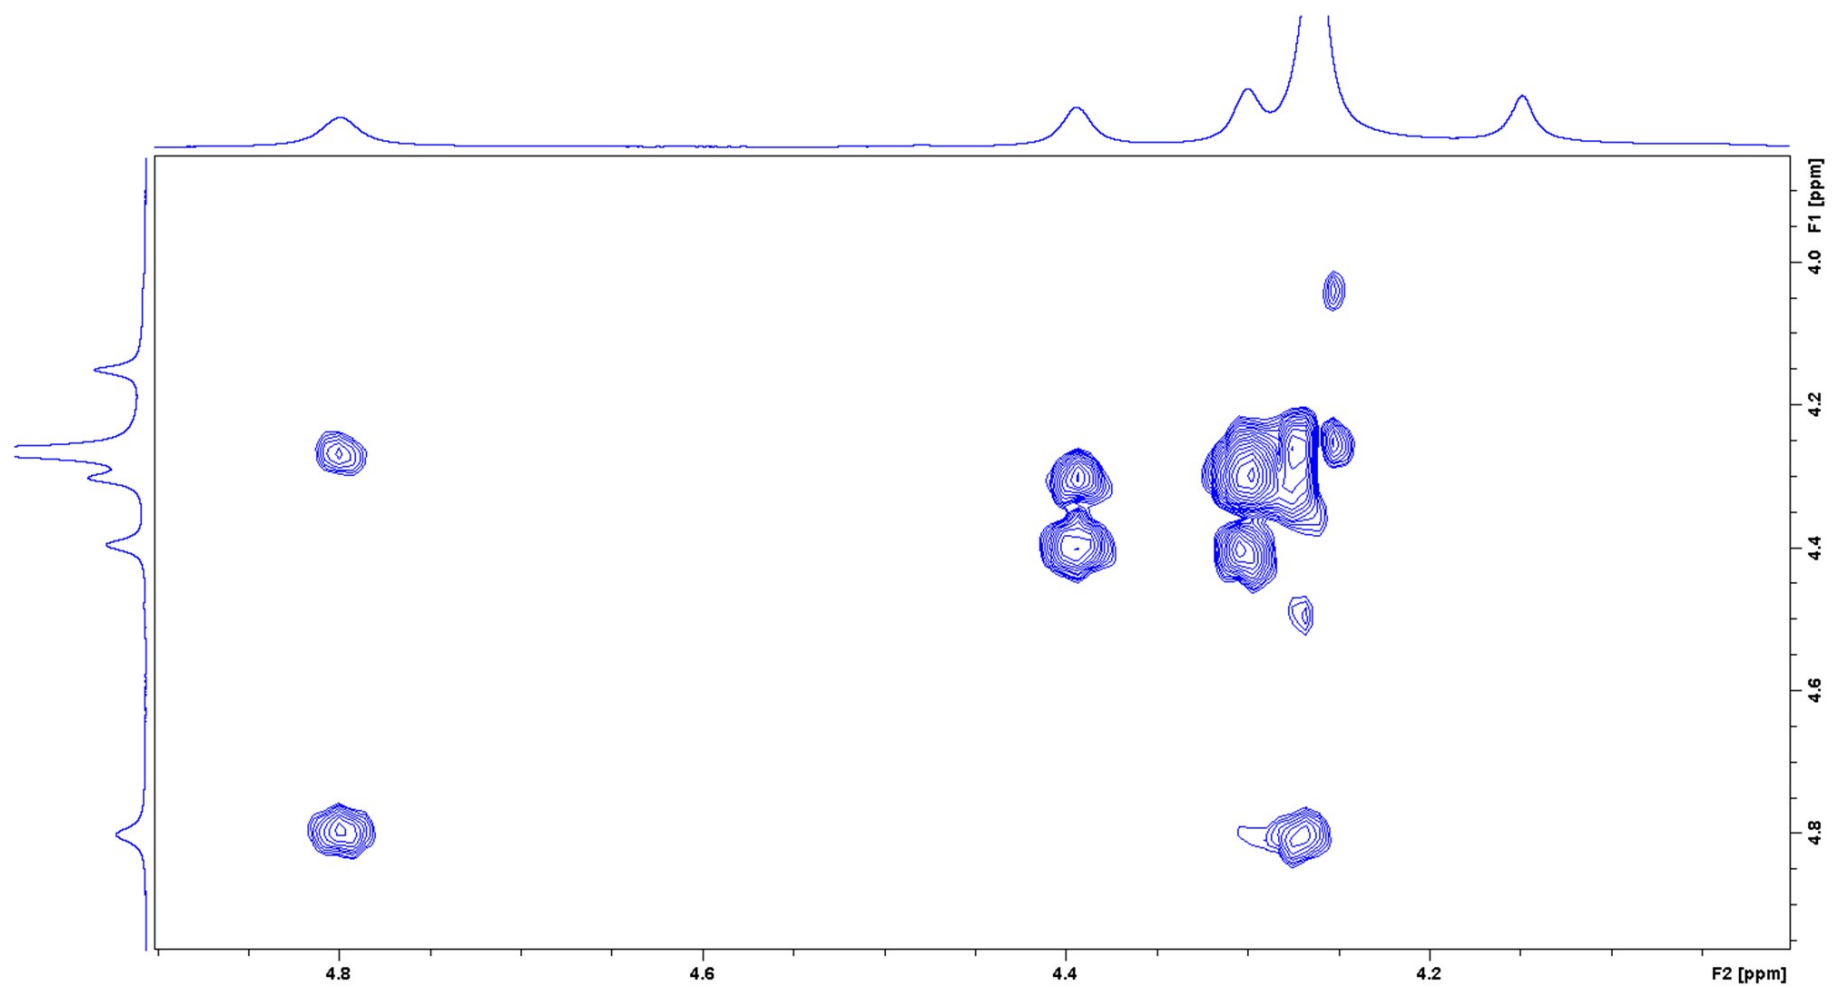

Figure S12. Magnified  $^1\text{H}$ - $^1\text{H}$  COSY spectrum of  $\text{Ni}(\text{Sal})^{\text{Fc}}$  recorded in  $\text{CDCl}_3$  at 298 K.

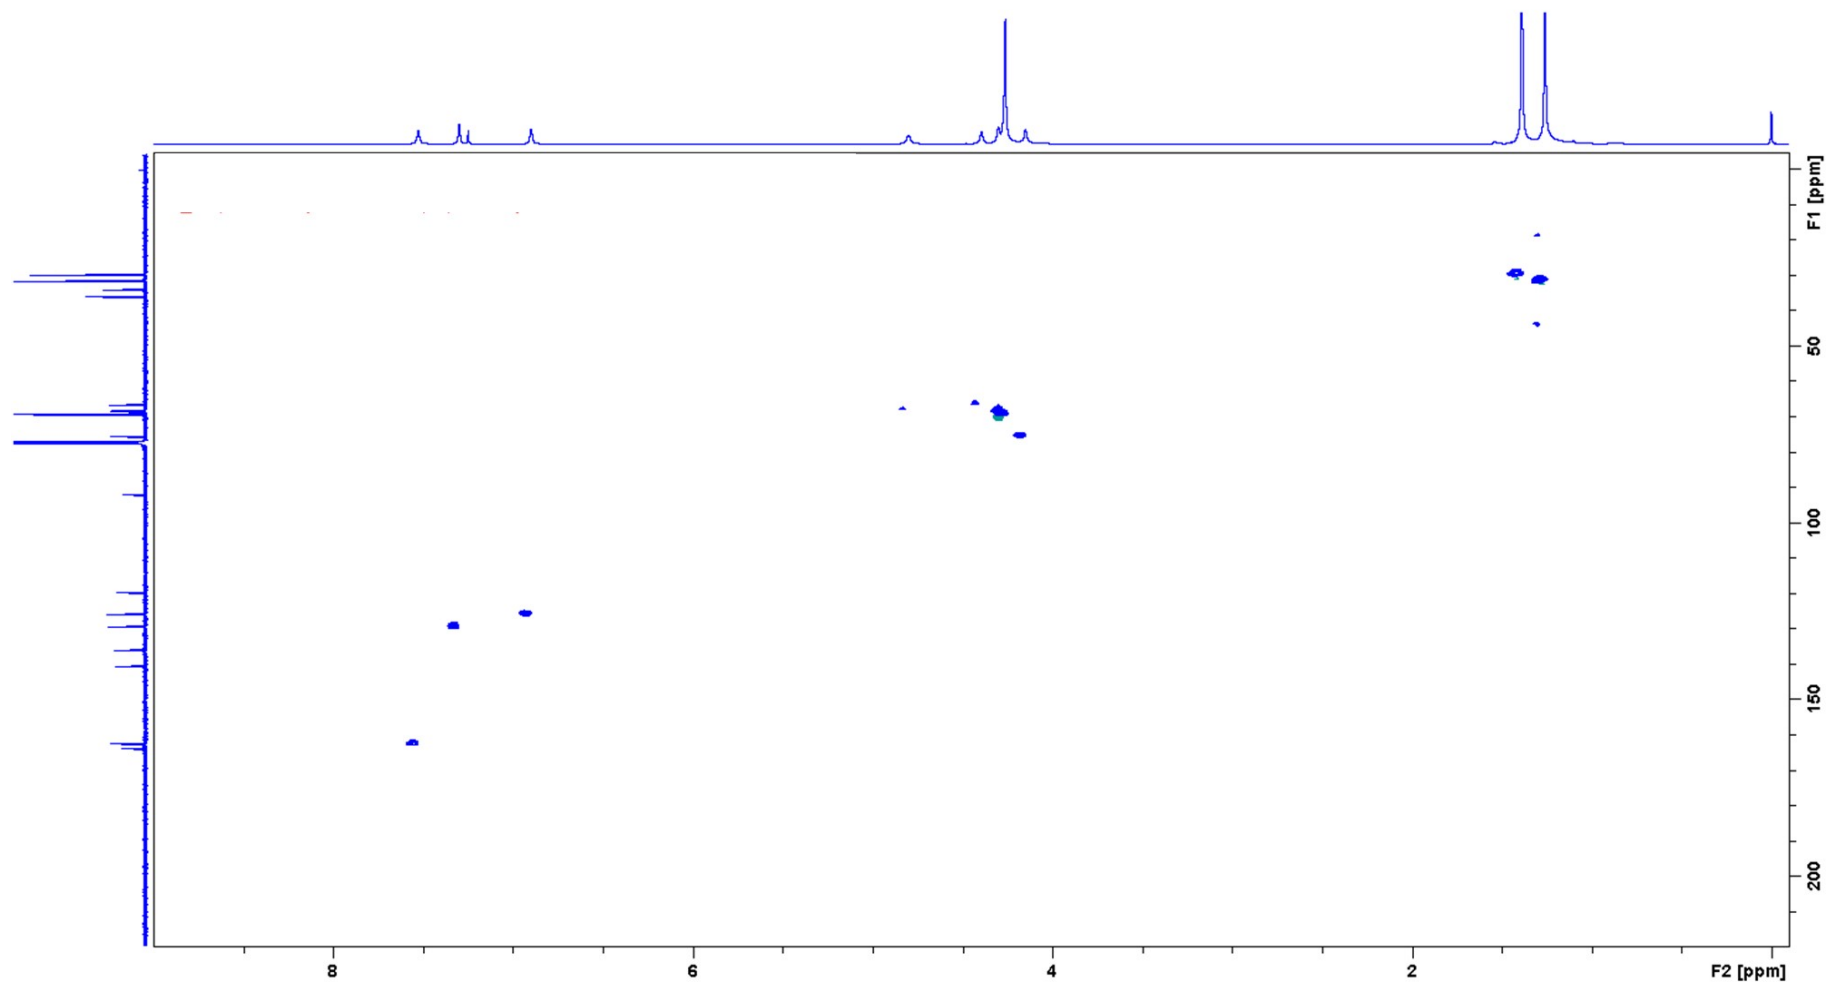

Figure S13. Full  $^1\text{H}$ - $^{13}\text{C}$  HSQC spectrum of  $\text{Ni}(\text{Sal})^{\text{Fe}}$  recorded in  $\text{CDCl}_3$  at 298 K.

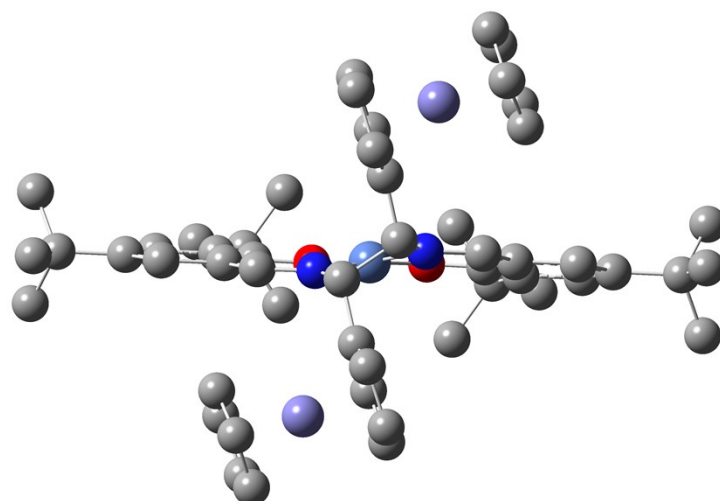

Figure S14. DFT optimized structure of  $\text{Ni}(\text{Sal})^{\text{Fc}}$ . H-atoms have been omitted for clarity.

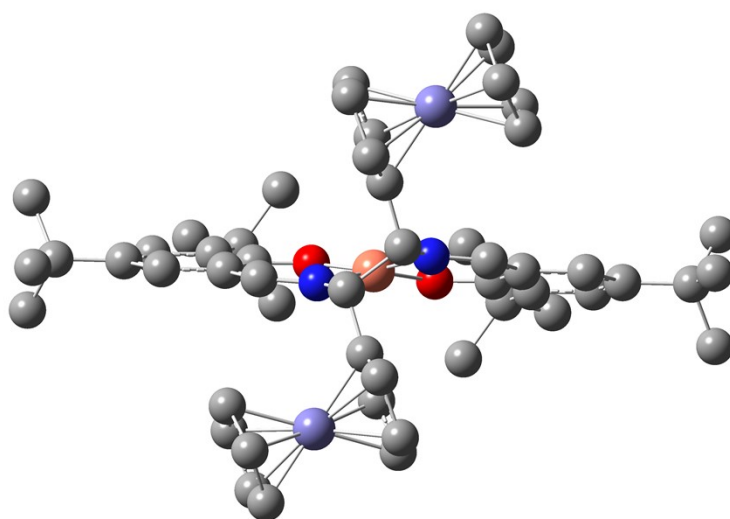

Figure S15. DFT optimized structure of  $\text{Cu}(\text{Sal})^{\text{Fc}}$ . H-atoms have been omitted for clarity.

Table S1. Select DFT computed bond distances (Å). See experimental section for computational details.

| Bond  | $\text{Ni}(\text{Sal})^{\text{Fc}}$ | $\text{Ni}(\text{Sal})^{\text{Ph}}$ | $\text{Cu}(\text{Sal})^{\text{Fc}}$ | $\text{Cu}(\text{Sal})^{\text{Ph}}$ |
|-------|-------------------------------------|-------------------------------------|-------------------------------------|-------------------------------------|
| M-N1  | 1.842                               | 1.843                               | 1.928                               | 1.931                               |
| M-N2  | 1.842                               | 1.843                               | 1.928                               | 1.930                               |
| M-O1  | 1.856                               | 1.857                               | 1.904                               | 1.904                               |
| M-O2  | 1.856                               | 1.857                               | 1.904                               | 1.905                               |
| C1-O1 | 1.309                               | 1.309                               | 1.306                               | 1.305                               |
| C7-O2 | 1.308                               | 1.309                               | 1.306                               | 1.305                               |

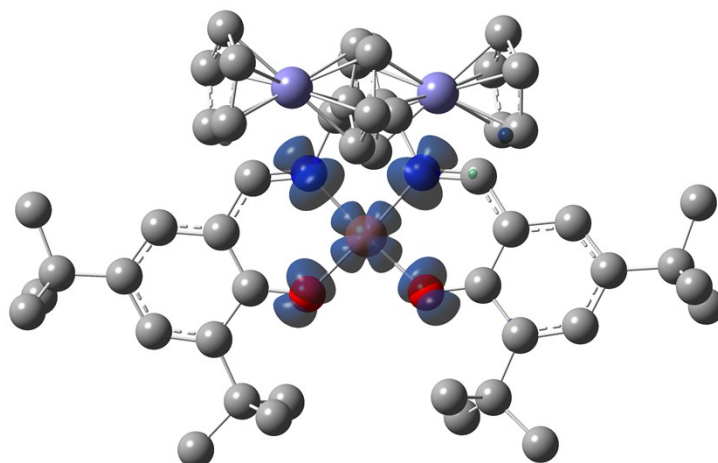

Figure S16. Spin density plot of  $\text{Cu}(\text{Sal})^{\text{Fc}}$  (Isovalue: 0.0021).

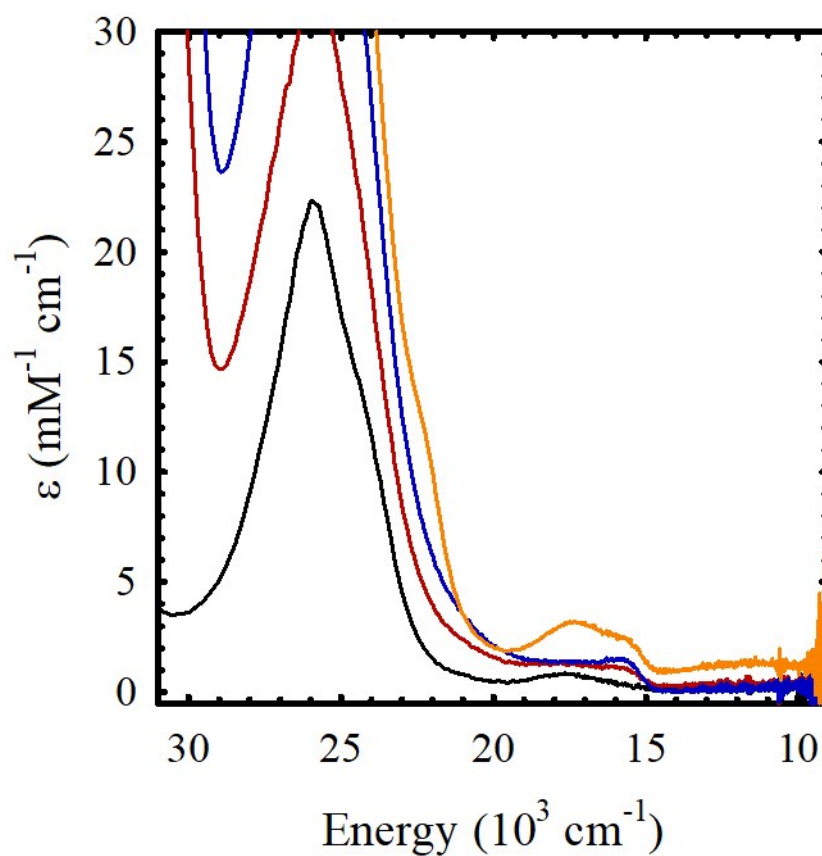

Figure S17. Sequential chemical oxidation of  $\text{Ni}(\text{Sal})^{\text{Fc}}$  (black) to its one-electron oxidized (red), two-electron oxidized (blue), and three-electron oxidized (orange) species. Inset: Near-IR region. Conditions: 0.4 mM  $\text{Ni}(\text{Sal})^{\text{Fc}}$  in  $\text{CH}_2\text{Cl}_2$ , 195 K.



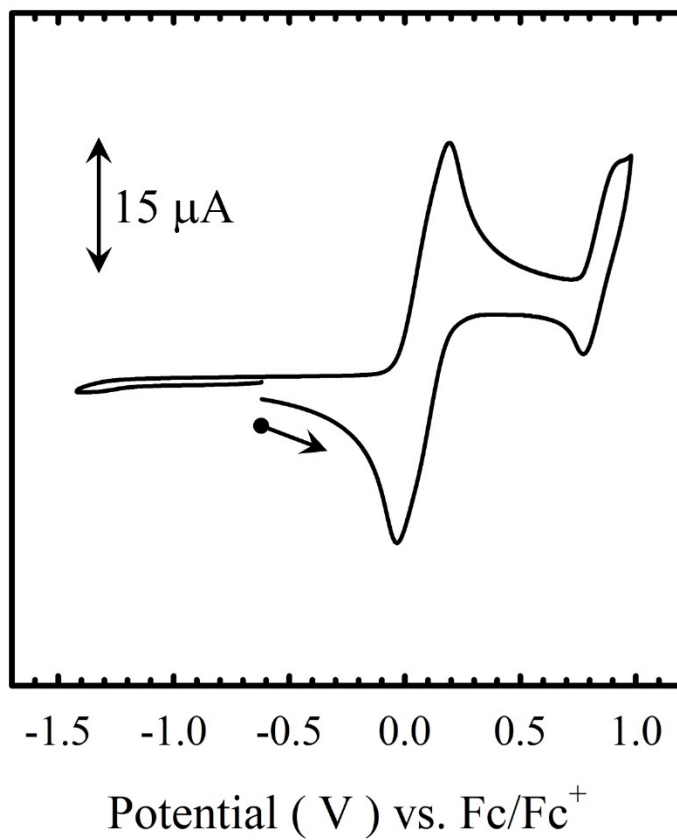

Figure S18. Cyclic voltammograms of *ca.* 1.5 mM solutions of  $\text{H}_2(\text{Sal})^{\text{Fc}}$  in  $\text{CH}_2\text{Cl}_2$ .

Optimized XYZ Coordinates of neutral **M(Sal)<sup>Fc</sup>** using the B3LYP functional with PCM = CH<sub>2</sub>Cl<sub>2</sub>.

| <b>Ni(Sal)<sup>Fc</sup></b> |             |             |             | <b>Cu(Sal)<sup>Fc</sup></b> |             |             |             |
|-----------------------------|-------------|-------------|-------------|-----------------------------|-------------|-------------|-------------|
| C(Fragment=2)               | 2.51651608  | 1.75600244  | -0.62649469 | C(Fragment=2)               | 2.59272581  | 1.77875997  | -0.66002377 |
| N(Fragment=2)               | 1.25656068  | -0.82417873 | -0.05347441 | N(Fragment=2)               | 1.29832869  | -0.79975320 | 0.06975184  |
| O(Fragment=2)               | 1.25743653  | 1.85686547  | -0.28486515 | O(Fragment=2)               | 1.31621970  | 1.93058939  | -0.43167836 |
| C(Fragment=2)               | 4.62044815  | 2.76200595  | -1.30086995 | C(Fragment=2)               | 4.75350599  | 2.71272598  | -1.26188692 |
| H(Fragment=2)               | 5.19141297  | 3.64730587  | -1.55306723 | H(Fragment=2)               | 5.35611457  | 3.57291161  | -1.52790857 |
| C(Fragment=2)               | 5.30680033  | 1.52017716  | -1.34744980 | C(Fragment=2)               | 5.41570977  | 1.45885622  | -1.19510566 |
| O(Fragment=2)               | -1.25716050 | 1.85704836  | 0.28434853  | O(Fragment=2)               | -1.31601488 | 1.93104640  | 0.42966699  |
| C(Fragment=2)               | 4.56425506  | 0.40256431  | -1.03412342 | C(Fragment=2)               | 4.63563171  | 0.37457235  | -0.85553947 |
| H(Fragment=2)               | 5.00924951  | -0.58769045 | -1.05098986 | H(Fragment=2)               | 5.06634021  | -0.61978920 | -0.78559332 |
| C(Fragment=2)               | 2.51343359  | -0.71698385 | -0.36656403 | C(Fragment=2)               | 2.55222367  | -0.70370220 | -0.24676439 |
| H(Fragment=2)               | 3.10650266  | -1.63350082 | -0.39043547 | H(Fragment=2)               | 3.14816799  | -1.62227944 | -0.26720929 |
| C(Fragment=2)               | 3.19381208  | 0.49585480  | -0.68004603 | C(Fragment=2)               | 3.24850940  | 0.50226187  | -0.58254865 |
| C(Fragment=2)               | 7.35409588  | 0.04439562  | -1.72756265 | C(Fragment=2)               | 7.45207881  | -0.07071400 | -1.37078158 |
| H(Fragment=2)               | 6.83125822  | -0.60112993 | -2.44277196 | H(Fragment=2)               | 6.95657576  | -0.74916230 | -2.07489385 |
| H(Fragment=2)               | 7.28050722  | -0.41454649 | -0.73484094 | H(Fragment=2)               | 7.31563014  | -0.46845454 | -0.35848821 |
| H(Fragment=2)               | 8.41341083  | 0.05890885  | -2.00789930 | H(Fragment=2)               | 8.52519931  | -0.09008875 | -1.59214421 |
| C(Fragment=2)               | 6.79413808  | 1.47926225  | -1.73690306 | C(Fragment=2)               | 6.92164736  | 1.36999463  | -1.49557538 |
| C(Fragment=2)               | 6.97620913  | 2.05738315  | -3.16082293 | C(Fragment=2)               | 7.19490994  | 1.85936838  | -2.93804836 |
| H(Fragment=2)               | 6.41763582  | 1.46699569  | -3.89649105 | H(Fragment=2)               | 6.66677194  | 1.23573376  | -3.66877993 |
| H(Fragment=2)               | 8.03529786  | 2.04339854  | -3.44658476 | H(Fragment=2)               | 8.26786449  | 1.81078584  | -3.16150291 |
| H(Fragment=2)               | 6.62789805  | 3.09366800  | -3.22853053 | H(Fragment=2)               | 6.87177267  | 2.89546825  | -3.08606149 |
| C(Fragment=2)               | 7.61822311  | 2.32373440  | -0.73567319 | C(Fragment=2)               | 7.70501739  | 2.25867038  | -0.49988117 |
| H(Fragment=2)               | 8.68063158  | 2.31143934  | -1.00889814 | H(Fragment=2)               | 8.78060793  | 2.21291697  | -0.71088576 |
| H(Fragment=2)               | 7.52408904  | 1.92564160  | 0.28138768  | H(Fragment=2)               | 7.54623003  | 1.92321149  | 0.53165132  |
| H(Fragment=2)               | 7.29225538  | 3.36932038  | -0.71789748 | H(Fragment=2)               | 7.39915490  | 3.30865480  | -0.56160994 |
| C(Fragment=2)               | 2.63962432  | 4.33293924  | -0.97095097 | C(Fragment=2)               | 2.78120769  | 4.32923055  | -1.11721423 |
| C(Fragment=2)               | 2.10363706  | 4.67495568  | 0.43927159  | C(Fragment=2)               | 2.18889524  | 4.74348220  | 0.25193491  |
| H(Fragment=2)               | 1.62645069  | 5.66317819  | 0.43226234  | H(Fragment=2)               | 1.73519106  | 5.74014623  | 0.17974765  |
| H(Fragment=2)               | 2.92555483  | 4.70503608  | 1.16558972  | H(Fragment=2)               | 2.97626350  | 4.78826502  | 1.01468522  |
| H(Fragment=2)               | 1.37211756  | 3.93931029  | 0.77334796  | H(Fragment=2)               | 1.42527989  | 4.03840995  | 0.58264041  |
| C(Fragment=2)               | 3.63723231  | 5.44306987  | -1.36108604 | C(Fragment=2)               | 3.81747420  | 5.40248764  | -1.50982032 |
| H(Fragment=2)               | 4.04190590  | 5.30310641  | -2.37030044 | H(Fragment=2)               | 4.26582252  | 5.20721273  | -2.49108759 |
| H(Fragment=2)               | 4.47711335  | 5.51141825  | -0.65969982 | H(Fragment=2)               | 4.62526329  | 5.48822219  | -0.77353801 |
| H(Fragment=2)               | 3.11880412  | 6.40859864  | -1.34706489 | H(Fragment=2)               | 3.31929622  | 6.37712524  | -1.56484581 |
| C(Fragment=2)               | 1.49004179  | 4.36578477  | -2.00684841 | C(Fragment=2)               | 1.67440414  | 4.34438031  | -2.19993410 |
| H(Fragment=2)               | 1.00443700  | 5.34970359  | -2.00299387 | H(Fragment=2)               | 1.22709690  | 5.34427132  | -2.26651759 |
| H(Fragment=2)               | 0.73743077  | 3.60788935  | -1.78629955 | H(Fragment=2)               | 0.88614259  | 3.62611970  | -1.97023247 |
| H(Fragment=2)               | 1.87898084  | 4.18718278  | -3.01706845 | H(Fragment=2)               | 2.09384234  | 4.09881959  | -3.18355963 |
| C(Fragment=2)               | 0.72052238  | -2.15255598 | 0.28942984  | C(Fragment=2)               | 0.69922285  | -2.10646496 | 0.35703421  |
| C(Fragment=2)               | -0.72074410 | -2.15245376 | -0.28952829 | C(Fragment=2)               | -0.69968225 | -2.10644153 | -0.35708701 |
| N(Fragment=2)               | -1.25658760 | -0.82401038 | 0.05344796  | N(Fragment=2)               | -1.29857215 | -0.79957159 | -0.07014676 |
| C(Fragment=2)               | 3.28471291  | 2.93209284  | -0.96380213 | C(Fragment=2)               | 3.40373084  | 2.91992875  | -1.01603492 |
| C(Fragment=2)               | -2.51341727 | -0.71664227 | 0.36659527  | C(Fragment=2)               | -2.55231680 | -0.70325637 | 0.24687771  |
| H(Fragment=2)               | -3.10659103 | -1.63308473 | 0.39055322  | H(Fragment=2)               | -3.14835402 | -1.62176062 | 0.26795342  |
| C(Fragment=2)               | -3.19361209 | 0.49630771  | 0.68007653  | C(Fragment=2)               | -3.24831116 | 0.50292587  | 0.58249211  |
| C(Fragment=2)               | -4.56401360 | 0.40320396  | 1.03435345  | C(Fragment=2)               | -4.63528942 | 0.37548978  | 0.85632021  |
| H(Fragment=2)               | -5.00912670 | -0.58699691 | 1.05129640  | H(Fragment=2)               | -5.06614113 | -0.61885412 | 0.78700722  |
| C(Fragment=2)               | -5.30638302 | 1.52093141  | 1.34768134  | C(Fragment=2)               | -5.41506735 | 1.45998828  | 1.19589395  |
| C(Fragment=2)               | -4.61989945 | 2.76268225  | 1.30083086  | C(Fragment=2)               | -4.75268841 | 2.71380784  | 1.26183682  |
| H(Fragment=2)               | -5.19072780 | 3.64807091  | 1.55302291  | H(Fragment=2)               | -5.35504621 | 3.57416759  | 1.52786477  |
| C(Fragment=2)               | -3.28421115 | 2.93258832  | 0.96348669  | C(Fragment=2)               | -3.40303055 | 2.92077103  | 1.01514236  |
| C(Fragment=2)               | -2.51618859 | 1.75636346  | 0.62625125  | C(Fragment=2)               | -2.59236058 | 1.77938871  | 0.65904907  |
| C(Fragment=2)               | -2.63897608 | 4.33337190  | 0.97030330  | C(Fragment=2)               | -2.78029104 | 4.33004147  | 1.11553496  |
| C(Fragment=2)               | -1.48927572 | 4.36626037  | 2.00606307  | C(Fragment=2)               | -1.67303327 | 4.34535234  | 2.19779848  |
| H(Fragment=2)               | -1.00348467 | 5.35008613  | 2.00192272  | H(Fragment=2)               | -1.22546632 | 5.34516531  | 2.26383934  |
| H(Fragment=2)               | -0.73682672 | 3.60817188  | 1.78561892  | H(Fragment=2)               | -0.88501993 | 3.62683948  | 1.96802347  |

|                |             |             |             |                |             |             |             |
|----------------|-------------|-------------|-------------|----------------|-------------|-------------|-------------|
| H(Fragment=2)  | -1.87813803 | 4.18796919  | 3.01636740  | H(Fragment=2)  | -2.09211225 | 4.10023372  | 3.18168491  |
| C(Fragment=2)  | -2.10311996 | 4.67508286  | -0.44005056 | C(Fragment=2)  | -2.18846774 | 4.74378230  | -0.25398728 |
| H(Fragment=2)  | -2.92512857 | 4.70512663  | -1.16626665 | H(Fragment=2)  | -2.97613126 | 4.78841079  | -1.01644235 |
| H(Fragment=2)  | -1.37171893 | 3.93930655  | -0.77409694 | H(Fragment=2)  | -1.42508169 | 4.03847707  | -0.58471206 |
| H(Fragment=2)  | -1.62583636 | 5.66325984  | -0.43326622 | H(Fragment=2)  | -1.73463863 | 5.74042119  | -0.18229737 |
| C(Fragment=2)  | -3.63641176 | 5.44368541  | 1.36034929  | C(Fragment=2)  | -3.81624765 | 5.40355034  | 1.50823324  |
| H(Fragment=2)  | -3.11788706 | 6.40915883  | 1.34604168  | H(Fragment=2)  | -3.31793302 | 6.37815259  | 1.56266362  |
| H(Fragment=2)  | -4.04094656 | 5.30398923  | 2.36965627  | H(Fragment=2)  | -4.26416744 | 5.20870386  | 2.48978152  |
| H(Fragment=2)  | -4.47639202 | 5.51196351  | 0.65907553  | H(Fragment=2)  | -4.62436522 | 5.48909141  | 0.77228819  |
| C(Fragment=2)  | -6.79365764 | 1.48022890  | 1.73738721  | C(Fragment=2)  | -6.92084825 | 1.37140005  | 1.49722858  |
| C(Fragment=2)  | -7.35376546 | 0.04541892  | 1.72831730  | C(Fragment=2)  | -7.45156800 | -0.06924462 | 1.37292350  |
| H(Fragment=2)  | -8.41302506 | 0.06007007  | 2.00885595  | H(Fragment=2)  | -8.52456557 | -0.08843053 | 1.59489760  |
| H(Fragment=2)  | -6.83085346 | -0.60007892 | 2.44349721  | H(Fragment=2)  | -6.95576961 | -0.74767887 | 2.07684142  |
| H(Fragment=2)  | -7.28041472 | -0.41364277 | 0.73563308  | H(Fragment=2)  | -7.31575270 | -0.46713484 | 0.36060382  |
| C(Fragment=2)  | -6.97542505 | 2.05854469  | 3.16126682  | C(Fragment=2)  | -7.19321287 | 1.86100686  | 2.93979484  |
| H(Fragment=2)  | -6.62698067 | 3.09479663  | 3.22878912  | H(Fragment=2)  | -6.86986906 | 2.89709043  | 3.08746787  |
| H(Fragment=2)  | -6.41680089 | 1.46818154  | 3.89691593  | H(Fragment=2)  | -6.66471805 | 1.23741289  | 3.67030226  |
| H(Fragment=2)  | -8.03446827 | 2.04471984  | 3.44720471  | H(Fragment=2)  | -8.26604253 | 1.81257778  | 3.16388304  |
| C(Fragment=2)  | -7.61782718 | 2.32466521  | 0.73619496  | C(Fragment=2)  | -7.70465522 | 2.26005967  | 0.50186831  |
| H(Fragment=2)  | -7.29176044 | 3.37021717  | 0.71824345  | H(Fragment=2)  | -7.39859889 | 3.31000716  | 0.56327244  |
| H(Fragment=2)  | -8.68019078 | 2.31250417  | 1.00959933  | H(Fragment=2)  | -8.78012945 | 2.21450195  | 0.71350744  |
| H(Fragment=2)  | -7.52390145 | 1.92644408  | -0.28083491 | H(Fragment=2)  | -7.54652436 | 1.92443553  | -0.52971138 |
| Ni(Fragment=1) | 0.00007917  | 0.52105666  | -0.00008736 | Cu(Fragment=1) | 0.00001179  | 0.62427509  | -0.00054356 |
| C(Fragment=2)  | -0.71488746 | -2.41888758 | -1.77785871 | C(Fragment=2)  | -0.54908904 | -2.35382644 | -1.84081989 |
| C(Fragment=2)  | -0.59807691 | -3.72435041 | -2.35968757 | C(Fragment=2)  | -0.32915761 | -3.64258096 | -2.42969619 |
| C(Fragment=2)  | -0.65874611 | -1.46899022 | -2.84710367 | C(Fragment=2)  | -0.45913644 | -1.38491857 | -2.89150953 |
| C(Fragment=2)  | -0.47112681 | -3.57710605 | -3.77340087 | C(Fragment=2)  | -0.10759811 | -3.46640802 | -3.82862761 |
| H(Fragment=2)  | -0.61576618 | -4.66090650 | -1.81576032 | H(Fragment=2)  | -0.34357869 | -4.58820779 | -1.90160700 |
| C(Fragment=2)  | -0.51278690 | -2.18246977 | -4.07407790 | C(Fragment=2)  | -0.19132207 | -2.07079482 | -4.11365188 |
| H(Fragment=2)  | -0.74427270 | -0.39599231 | -2.74288878 | H(Fragment=2)  | -0.60468006 | -0.31850677 | -2.78377348 |
| H(Fragment=2)  | -0.39102717 | -4.38288896 | -4.49181736 | H(Fragment=2)  | 0.06158384  | -4.25585563 | -4.54970034 |
| H(Fragment=2)  | -0.47007044 | -1.74108921 | -5.06149780 | H(Fragment=2)  | -0.09745875 | -1.61188680 | -5.08944637 |
| C(Fragment=2)  | 0.71452499  | -2.41905459 | 1.77775598  | C(Fragment=2)  | 0.54855738  | -2.35350161 | 1.84081345  |
| C(Fragment=2)  | 0.59785919  | -3.72456324 | 2.35951744  | C(Fragment=2)  | 0.32851080  | -3.64211675 | 2.42994775  |
| C(Fragment=2)  | 0.65795023  | -1.46920891 | 2.84702853  | C(Fragment=2)  | 0.45840402  | -1.38435223 | 2.89125787  |
| C(Fragment=2)  | 0.47060283  | -3.57739910 | 3.77321419  | C(Fragment=2)  | 0.10668711  | -3.46562475 | 3.82879364  |
| H(Fragment=2)  | 0.61588357  | -4.66109654 | 1.81556127  | H(Fragment=2)  | 0.34303661  | -4.58786121 | 1.90207030  |
| C(Fragment=2)  | 0.51192135  | -2.18276243 | 4.07395222  | C(Fragment=2)  | 0.19036305  | -2.06994114 | 4.11351313  |
| H(Fragment=2)  | 0.74329524  | -0.39619043 | 2.74287014  | H(Fragment=2)  | 0.60394564  | -0.31796198 | 2.78329486  |
| H(Fragment=2)  | 0.39048321  | -4.38322188 | 4.49158390  | H(Fragment=2)  | -0.06262391 | -4.25490555 | 4.55001890  |
| H(Fragment=2)  | 0.46887720  | -1.74142317 | 5.06137676  | H(Fragment=2)  | 0.09632265  | -1.61080613 | 5.08918393  |
| Fe(Fragment=2) | -2.23548485 | -2.75972247 | -3.12332667 | Fe(Fragment=2) | -1.94994651 | -2.73954191 | -3.29611529 |
| Fe(Fragment=2) | 2.23488813  | -2.75960362 | 3.12349250  | Fe(Fragment=2) | 1.94914382  | -2.73888807 | 3.29648595  |
| C(Fragment=2)  | 3.70622334  | -3.30568992 | 4.44925674  | C(Fragment=2)  | 3.29676298  | -3.32859185 | 4.73113774  |
| C(Fragment=2)  | 3.81618145  | -4.06711591 | 3.24665543  | C(Fragment=2)  | 3.45637387  | -4.11334576 | 3.54964779  |
| C(Fragment=2)  | 3.83397235  | -1.92455301 | 4.11096041  | C(Fragment=2)  | 3.51030930  | -1.96008721 | 4.38489277  |
| H(Fragment=2)  | 3.53253469  | -3.70464797 | 5.44047040  | H(Fragment=2)  | 3.03580680  | -3.70330168 | 5.71263441  |
| C(Fragment=2)  | 4.01151376  | -3.15619333 | 2.16463990  | C(Fragment=2)  | 3.76811737  | -3.22967970 | 2.47186594  |
| H(Fragment=2)  | 3.74470970  | -5.14425264 | 3.16618566  | H(Fragment=2)  | 3.34179783  | -5.18741918 | 3.47851289  |
| C(Fragment=2)  | 4.02284281  | -1.83093952 | 2.69935405  | C(Fragment=2)  | 3.80196132  | -1.89775380 | 2.98892004  |
| H(Fragment=2)  | 3.77536409  | -1.09229302 | 4.80054204  | H(Fragment=2)  | 3.44107901  | -1.11511120 | 5.05784487  |
| H(Fragment=2)  | 4.12514883  | -3.42738284 | 1.12281373  | H(Fragment=2)  | 3.94014046  | -3.52155112 | 1.44368012  |
| H(Fragment=2)  | 4.14032412  | -0.91535776 | 2.13466473  | H(Fragment=2)  | 4.00007999  | -0.99762459 | 2.42182434  |
| C(Fragment=2)  | -3.70688767 | -3.30680016 | -4.44860770 | C(Fragment=2)  | -3.29779510 | -3.33030260 | -4.73012615 |
| C(Fragment=2)  | -3.81664067 | -4.06753397 | -3.24554273 | C(Fragment=2)  | -3.45738624 | -4.11402486 | -3.54795550 |
| C(Fragment=2)  | -3.83475749 | -1.92547201 | -4.11111725 | C(Fragment=2)  | -3.51111211 | -1.96147197 | -4.38502790 |
| H(Fragment=2)  | -3.53327089 | -3.70633374 | -5.43960144 | H(Fragment=2)  | -3.03699788 | -3.70588257 | -5.71133231 |
| C(Fragment=2)  | -4.01199802 | -3.15599802 | -2.16405630 | C(Fragment=2)  | -3.76889051 | -3.22939728 | -2.47089052 |
| H(Fragment=2)  | -3.74504679 | -5.14461476 | -3.16445232 | H(Fragment=2)  | -3.34295864 | -5.18805418 | -3.47592065 |
| C(Fragment=2)  | -4.02352008 | -1.83105497 | -2.69954773 | C(Fragment=2)  | -3.80260065 | -1.89790193 | -2.98907422 |

|               |             |             |             |               |             |             |             |
|---------------|-------------|-------------|-------------|---------------|-------------|-------------|-------------|
| H(Fragment=2) | -3.77633291 | -1.09362184 | -4.80120760 | H(Fragment=2) | -3.44183603 | -1.11708417 | -5.05871311 |
| H(Fragment=2) | -4.12554313 | -3.42646007 | -1.12203084 | H(Fragment=2) | -3.94086743 | -3.52037033 | -1.44244426 |
| H(Fragment=2) | -4.14108075 | -0.91517531 | -2.13535413 | H(Fragment=2) | -4.00051506 | -0.99726481 | -2.42271155 |
| H(Fragment=2) | -1.30613812 | -2.93105754 | 0.21185319  | H(Fragment=2) | -1.30496313 | -2.90904570 | 0.08146075  |
| H(Fragment=2) | 1.30583254  | -2.93122883 | -0.21194428 | H(Fragment=2) | 1.30437743  | -2.90926674 | -0.08132443 |
